# Supplementary material for: Polarity gene alterations in pure invasive micropapillary carcinomas of the breast
Source: PubMed Central journal article supplement (PMC4095699; doi:10.1186/bcr3653), 2014-05-08
Supplement: bcr3653-S1.pdf [file bcr3653-S1.pdf]

## 50 IMPC tumors

- SNP6.0 (n=39)
- MiSeq (n=47)
- *TP53* classical Sanger sequencing (n=43)\*
- *PIK3CA* classical Sanger sequencing (n=41)§
- Whole exome sequencing (n=4)#
- Whole transcriptome (n=6) #

\*: 39 out 43 tumors have been analyzed on SNP6.0 arrays too

§: 39 out 41 tumors have been analyzed on SNP6.0 arrays too

#: analyzed on SNP6.0 arrays and MiSeq too

| Tumor   | SNP6.0 arrays | whole exome sequencing | MiSeq | whole transcriptome sequencing | <i>TP53</i> mutation | <i>PIK3CA</i> mutation |
|---------|---------------|------------------------|-------|--------------------------------|----------------------|------------------------|
| IMPC_01 |               |                        |       |                                |                      |                        |
| IMPC_02 |               |                        |       |                                |                      |                        |
| IMPC_03 |               |                        |       |                                |                      |                        |
| IMPC_04 |               |                        |       |                                |                      |                        |
| IMPC_05 |               |                        |       |                                |                      |                        |
| IMPC_06 |               |                        |       |                                |                      |                        |
| IMPC_07 |               |                        |       |                                |                      |                        |
| IMPC_08 |               |                        |       |                                |                      |                        |
| IMPC_09 |               |                        |       |                                |                      |                        |
| IMPC_10 |               |                        |       |                                |                      |                        |
| IMPC_12 |               |                        |       |                                |                      |                        |
| IMPC_13 |               |                        |       |                                |                      |                        |
| IMPC_14 |               |                        |       |                                |                      |                        |
| IMPC_16 |               |                        |       |                                |                      |                        |
| IMPC_17 |               |                        |       |                                |                      |                        |
| IMPC_18 |               |                        |       |                                |                      |                        |
| IMPC_19 |               |                        |       |                                |                      |                        |
| IMPC_20 |               |                        |       |                                |                      |                        |
| IMPC_21 |               |                        |       |                                |                      |                        |
| IMPC_26 |               |                        |       |                                |                      |                        |
| IMPC_27 |               |                        |       |                                |                      |                        |
| IMPC_29 |               |                        |       |                                |                      |                        |
| IMPC_30 |               |                        |       |                                |                      |                        |
| IMPC_31 |               |                        |       |                                |                      |                        |
| IMPC_32 |               |                        |       |                                |                      |                        |
| IMPC_33 |               |                        |       |                                |                      |                        |
| IMPC_34 |               |                        |       |                                |                      |                        |
| IMPC_36 |               |                        |       |                                |                      |                        |
| IMPC_38 |               |                        |       |                                |                      |                        |
| IMPC_39 |               |                        |       |                                |                      |                        |
| IMPC_41 |               |                        |       |                                |                      |                        |
| IMPC_42 |               |                        |       |                                |                      |                        |
| IMPC_43 |               |                        |       |                                |                      |                        |
| IMPC_44 |               |                        |       |                                |                      |                        |
| IMPC_45 |               |                        |       |                                |                      |                        |
| IMPC_47 |               |                        |       |                                |                      |                        |
| IMPC_49 |               |                        |       |                                |                      |                        |
| IMPC_50 |               |                        |       |                                |                      |                        |
| IMPC_55 |               |                        |       |                                |                      |                        |
| IMPC_57 |               |                        |       |                                |                      |                        |
| IMPC_59 |               |                        |       |                                |                      |                        |
| IMPC_60 |               |                        |       |                                |                      |                        |
| IMPC_61 |               |                        |       |                                |                      |                        |
| IMPC_66 |               |                        |       |                                |                      |                        |
| IMPC_69 |               |                        |       |                                |                      |                        |
| IMPC_70 |               |                        |       |                                |                      |                        |
| IMPC_72 |               |                        |       |                                |                      |                        |
| IMPC_74 |               |                        |       |                                |                      |                        |
| IMPC_75 |               |                        |       |                                |                      |                        |
| IMPC_76 |               |                        |       |                                |                      |                        |
