# Supplementary material for: Polarity gene alterations in pure invasive micropapillary carcinomas of the breast
Source: PubMed Central journal article supplement (PMC4095699; doi:10.1186/bcr3653), 2014-05-08
Supplement: bcr3653-S3.pdf [file bcr3653-S3.pdf]

**Supplementary Table 8A: deFuse post analysis filtering.**

| deFuse Filters                                                                                                         | Threshold   |
|------------------------------------------------------------------------------------------------------------------------|-------------|
| : number of split reads supporting the prediction                                                                      | $\geq 2$    |
| : number of spanning reads supporting the fusion                                                                       | $\geq 5$    |
| : <i>p</i> -value, lower values are evidence the prediction is a false positive                                        | $> 0.1$     |
| : <i>p</i> -value, lower values are evidence the prediction is a false positive                                        |             |
| : <i>p</i> -value, lower values are evidence the prediction is a false positive                                        |             |
| : maximum percent identity of fusion sequence alignments to EST islands                                                | $< 0.3$     |
| : maximum percent identity of fusion sequence alignments to EST                                                        |             |
| : maximum percent identity of fusion sequence alignments to cDNA                                                       | $< 0.1$     |
| : maximum percent identity of fusion sequence alignments to genome                                                     |             |
| : number of spanning reads that map to more than one genomic location                                                  | $< 1$       |
| : fusion involving adjacent potentially resulting from co-transcription rather than genome rearrangement (Readthrough) | NO          |
| : fusion between adjacent genes                                                                                        |             |
| : fusion likely the product of alternative splicing between adjacent genes                                             |             |
| : probability produced by classification using adaboost                                                                | $\geq 0.75$ |
| : fusion combines genes in a way that preserves a reading frame                                                        | YES         |

**Supplementary Table 8B: Fusion candidates that were common in TopHat-Fusion and deFuse analysis and had been validated by RT-PCR technique.**

| Gene name<br>1 | Gene name<br>2  | Strand | Spanning<br>read<br>count | Split<br>read<br>count | Gene<br>location<br>1 | Gene<br>location<br>2 | Genomic<br>break pos 1 | Genomic<br>break pos 2 | Library<br>name | Probabi<br>lity |
|----------------|-----------------|--------|---------------------------|------------------------|-----------------------|-----------------------|------------------------|------------------------|-----------------|-----------------|
| <i>DUS1L</i>   | <i>B4GALNT2</i> | -/+    | 69                        | 49                     | coding                | coding                | 80021344               | 47241450               | IMPC_13         | 0.99            |
| <i>ZNF256</i>  | <i>SKA2</i>     | -/-    | 32                        | 29                     | 5'utr                 | coding                | 57232703               | 58458813               | IMPC_13         | 0.85            |
| <i>RERE</i>    | <i>ACTN4</i>    | -/+    | 10                        | 11                     | coding                | coding                | 8482787                | 39191240               | IMPC_14         | 0.98            |
| <i>ZNF8</i>    | <i>GIP</i>      | +/-    | 50                        | 92                     | coding                | 5'utr                 | 58790513               | 47044615               | IMPC_13         | 0.99            |
| <i>HEATR7A</i> | <i>RSPRY1</i>   | +/+    | 36                        | 71                     | coding                | coding                | 145235426              | 57265079               | IMPC_21         | 0.95            |
| <i>CHD6</i>    | <i>GATA5</i>    | +/-    | 211                       | 437                    | coding                | intron                | 40034129               | 61044084               | IMPC_16         | 0.76            |
