# Supplementary material for: Polarity gene alterations in pure invasive micropapillary carcinomas of the breast
Source: PubMed Central journal article supplement (PMC4095699; doi:10.1186/bcr3653), 2014-05-08
Supplement: bcr3653-S4.pdf [file bcr3653-S4.pdf]

| <b>Primers name</b>      | <b>Primers sequence</b>      |
|--------------------------|------------------------------|
| Fus_RERE_ACTN4_Left      | 5'-TCAGGCAGTACGGGAAGAAC-3'   |
| Fus_RERE_ACTN4_Right     | 5'-GATCTGTGTGCCTGCCTTC-3'    |
| Fus_DUS1L_B4GALNT2_Left  | 5'-CCAAC TACCGGAAGGAGAAC-3'  |
| Fus_DUS1L_B4GALNT2_Right | 5'-AGAACGTATTTGGTGGTGAC-3'   |
| Fus_ZNF256_SKA2_Left     | 5'-TCATAAATCTGGCATGTGAAA-3'  |
| Fus_ZNF256_SKA2_Right    | 5'-TGGACTGATTACTTGGTAGAAA-3' |
| Fus_ZNF8_GIP_Left        | 5'-CCATGGCAATACTGTAGTCA-3'   |
| Fus_ZNF8_GIP_Right       | 5'-GGAGTGCCTCTCTGGTCT-3'     |
| Fus_CHD6_GATA5_Left      | 5'-ATACTGCAGGAGACAAAGGA-3'   |
| Fus_CHD6_GATA5_Right     | 5'-AGTCTGCTTGACTGGCTAAG-3'   |
| Fus_HEATR7_RSPRY1_Left   | 5'-AGACAGTTCATCAGCAAGGT-3'   |
| Fus_HEATR7_RSPRY1_Right  | 5'-TCTCGGATACTGACTTGCTTC-3'  |

Supplementary Table 9 : RT PCR primers sequences for fusion's validation
