# Supplementary material for: Polarity gene alterations in pure invasive micropapillary carcinomas of the breast
Source: PubMed Central journal article supplement (PMC4095699; doi:10.1186/bcr3653), 2014-05-08
Supplement: bcr3653-S7.pdf [file bcr3653-S7.pdf]

**Supplementary table 2: Frequencies of common and specific gains and losses in Sawtooth/8/16 and Firestorm/Amplifier IMPC subsets.**

| Pos SNP Start           | Pos SNP End | Chr | Cytoband      | Sawtooth/8/16 (%) | Firestorm/Amplifier (%) | Genes of interest                         |
|-------------------------|-------------|-----|---------------|-------------------|-------------------------|-------------------------------------------|
| <b>Common regions</b>   |             |     |               |                   |                         |                                           |
| <i>Gains</i>            |             |     |               |                   |                         |                                           |
| 36872094                | 146293414   | 8   | p11.23-q24.3  | 83                | 53                      |                                           |
| <i>Losses</i>           |             |     |               |                   |                         |                                           |
| 315843                  | 35282003    | 8   | p23.3-p12     | 62                | 66                      |                                           |
| 46534977                | 90163275    | 16  | q11.2-q24.3   | 74                | 40                      |                                           |
| <b>Specific regions</b> |             |     |               |                   |                         |                                           |
| <i>Gains</i>            |             |     |               |                   |                         |                                           |
| 552621                  | 35205717    | 16  | p13.3-p11.1   | 71                | 8                       |                                           |
| 25899668                | 28036350    | 17  | q11.2         | 0                 | 44                      |                                           |
| 35306175                | 38327133    | 17  | q12-q21.1     | 0                 | 59                      |                                           |
| 47177747                | 81049725    | 17  | q21.32-q25.3  | 18                | 62                      |                                           |
| 46889933                | 62912463    | 20  | q13.13-q13.33 | 18                | 51                      |                                           |
| <i>Losses</i>           |             |     |               |                   |                         |                                           |
| 34811050                | 114150717   | 1   | p34.3-p13.2   | 8                 | 49                      |                                           |
| 70106360                | 170918031   | 6   | q13-q27       | 50*               | 23*                     |                                           |
| 2310130                 | 22235650    | 17  | p13.3-p11.1   | 15                | 74                      |                                           |
| 32541260                | 35320846    | 17  | q12           | 13                | 43                      |                                           |
| 41982253                | 46948218    | 17  | q21.31-31.32  | 13                | 41                      |                                           |
| 34734484                | 77828600    | 18  | q12.2-q23     | 11                | 42                      |                                           |
| <b>Amplifications</b>   |             |     |               |                   |                         |                                           |
| 94690198                | 132251807   | 8   | q22.1-q24.22  | 2                 | 35                      | <i>RAD54B, CCNE2, TP53INP1, RAD21, M</i>  |
| 37251066                | 38303547    | 17  | q12-q21.1     | 0                 | 37                      | <i>STARD3, ERBB2, GRB7</i>                |
| 48579452                | 49994258    | 17  | q21.33        | 5                 | 20                      |                                           |
| 57486793                | 62354992    | 17  | q22-q23.3     | 6                 | 46                      | <i>PPM1D, BCAS3, TBX2, TBX4, TLK1, TL</i> |
| 48483623                | 49500894    | 20  | q13.13        | 0                 | 23                      | <i>BCAS4</i>                              |
| 50796522                | 53259964    | 20  | q13.2         | 0                 | 30                      | <i>ZNF217, BCAS1</i>                      |

**Legends:** Recurrent gains, losses or amplifications regions after exclusion of genomic variant according to the DGV database, observed in more than 40% of cases. Pos SNP Start/ pos SNP End: position of the SNP that represent the boundaries of gains, losses or amplifications. Genomic positions are provided according to human genome 19 references in bp; Chr: chromosome; IMPC: invasive micropapillary carcinoma; \*: losses associated with loss of heterozygosity (LOH).
