# Supplementary material for: Polarity gene alterations in pure invasive micropapillary carcinomas of the breast
Source: PubMed Central journal article supplement (PMC4095699; doi:10.1186/bcr3653), 2014-05-08
Supplement: bcr3653-S8.pdf [file bcr3653-S8.pdf]

**Supplementary Table 3: Frequencies of common and specific regions of gains and losses in Firestorm/Amplifier IMPC subgroup and IDC-NST.**

| Pos SNP<br>Start        | Pos SNP<br>End | Chr | Cytoband      | Firestorm/Amplifier<br>(%) | IDC-NST<br>(%) |
|-------------------------|----------------|-----|---------------|----------------------------|----------------|
| <b>Common regions</b>   |                |     |               |                            |                |
| <i>Gains</i>            |                |     |               |                            |                |
| 154625632               | 249198692      | 1   | q21.3-q44     | 41                         | 43             |
| 36948617                | 38618768       | 8   | p11.23-p11.22 | 45                         | 42             |
| 43614559                | 62912463       | 20  | q13.12-q13.33 | 48                         | 45             |
| <i>Losses</i>           |                |     |               |                            |                |
| 26214603                | 113346108      | 1   | p36.11-p13.2  | 50                         | 40             |
| 113565                  | 35323410       | 8   | p23.3-p12     | 65*                        | 60*            |
| 80033803                | 134944770      | 11  | q14.1-q25     | 45*                        | 45*            |
| 39949125                | 115106996      | 13  | q13.3-q34     | 41*                        | 40*            |
| 46534977                | 90163275       | 16  | q11.2-q24.3   | 41*                        | 54*            |
| 16055171                | 51219006       | 22  | q11.1-q13.33  | 61*                        | 40*            |
| <b>Specific regions</b> |                |     |               |                            |                |
| <i>Gains</i>            |                |     |               |                            |                |
| 25311244                | 28026491       | 17  | q11.1-q11.2   | 43                         | 10             |
| 35306175                | 38256973       | 17  | q12-q21.1     | 60                         | 18             |
| 46954793                | 81049725       | 17  | q21.32-q25.3  | 62                         | 15             |
| 33435161                | 38150561       | 20  | q11.22-q12    | 13                         | 43             |
| <i>Losses</i>           |                |     |               |                            |                |
| 6689                    | 22235650       | 17  | p13.3-p11.1   | 78*                        | 41*            |

**Legends:** Recurrent gains, losses or amplifications regions after exclusion of genomic variant according to the DGV database, observed in more than 40% of cases. Pos SNP Start/ pos SNP End: position of the SNP that represent the boundaries of gains, losses or amplifications. Genomic positions are provided according to human genome 19 references in bp ; Chr: chromosome ; IMPC: invasive micropapillary carcinoma ; IDC-NST: invasive carcinomas of no special type; \*: losses associated with loss of heterozygosity (LOH).
