# Supplementary material for: Polarity gene alterations in pure invasive micropapillary carcinomas of the breast
Source: PubMed Central journal article supplement (PMC4095699; doi:10.1186/bcr3653), 2014-05-08
Supplement: bcr3653-S9.pdf [file bcr3653-S9.pdf]

**Supplementary Table 4: Frequencies of common and specific regions of gains and losses in Sawtooth/8/16 IMPC subgroup and IDC-NST.**

| Pos SNP<br>Start        | Pos SNP<br>End | Chr | Cytoband      | Sawtooth/8/16<br>(%) | IDC-NST<br>(%) |
|-------------------------|----------------|-----|---------------|----------------------|----------------|
| <b>Common regions</b>   |                |     |               |                      |                |
| <i>Losses</i>           |                |     |               |                      |                |
| 113565                  | 35436036       | 8   | p23.3-p12     | 63*                  | 61*            |
| 23921202                | 51219006       | 22  | q11.23-q13.33 | 49*                  | 43*            |
| <b>Specific regions</b> |                |     |               |                      |                |
| <i>Gains</i>            |                |     |               |                      |                |
| 197811282               | 249198692      | 1   | q31.3-q44     | 6                    | 48             |
| 36694951                | 146292734      | 8   | p11.23-q24.3  | 80                   | 45             |
| 86671                   | 35205717       | 16  | p13.3-p11.1   | 68                   | 25             |
| 33435161                | 62648208       | 20  | q11.22-q13.33 | 7                    | 44             |
| <i>Losses</i>           |                |     |               |                      |                |
| 45477675                | 99170631       | 1   | p34.1-p21.3   | 11                   | 42             |
| 70456678                | 170918031      | 6   | q13-q27       | 50*                  | 16*            |
| 80033803                | 134944770      | 11  | q14.1-q25     | 22*                  | 47*            |
| 46534977                | 90163275       | 16  | q11.2-q24.3   | 79*                  | 54*            |
| 531729                  | 20030960       | 17  | p13.3-p11.2   | 13*                  | 43*            |

**Legends:** Recurrent gains, losses or amplifications regions after exclusion of genomic variant according to the DGV database, observed in more than 40% of cases. Pos SNP Start/ pos SNP End: position of the SNP that represent the boundaries of gains, losses or amplifications. Genomic positions are provided according to human genome 19 references in bp; Chr: chromosome; IMPC: invasive micropapillary carcinoma ; IDC-NST: invasive carcinomas of no special type; \*: losses associated with loss of heterozygosity (LOH).
