# Supplementary material for: Polarity gene alterations in pure invasive micropapillary carcinomas of the breast
Source: PubMed Central journal article supplement (PMC4095699; doi:10.1186/bcr3653), 2014-05-08
Supplement: bcr3653-S11.pdf [file bcr3653-S11.pdf]

**Supplementary Table 7: Frequencies of common and specific regions of gains and losses in IMPC and luminal B IDC-NST.**

| Pos SNP Start           | Pos SNP End | Chr | Cytoband      | IMPC | lum B IDC-NST |
|-------------------------|-------------|-----|---------------|------|---------------|
| <b>Common regions</b>   |             |     |               |      |               |
| <i>Gains</i>            |             |     |               |      |               |
| 47043376                | 146263538   | 8   | q11.21-q24.3  | 66   | 51            |
| 49959379                | 64819791    | 17  | q22-q24.2     | 48   | 33            |
| <i>Losses</i>           |             |     |               |      |               |
| 103565                  | 33777560    | 8   | p23.3-p12     | 63   | 66            |
| 6689                    | 18837022    | 17  | p13.3-p11.2   | 46   | 53            |
| 25196483                | 29511625    | 17  | q11.2         | 24   | 53            |
| 23664977                | 49565872    | 22  | q11.23-q13.32 | 55   | 47            |
| 45092478                | 88690776    | 16  | q11.2-q24.2   | 55   | 37            |
| <b>Specific regions</b> |             |     |               |      |               |
| <i>Gains</i>            |             |     |               |      |               |
| 224028565               | 238251069   | 1   | q42.12-q43    | 25   | 56            |
| 32596025                | 62341267    | 20  | q11.22-q13.33 | 25   | 50            |
| <i>Losses</i>           |             |     |               |      |               |
| 47042807                | 73900069    | 3   | p21.31-p13    | 19   | 43            |
| 106624649               | 109132959   | 6   | q21           | 50   | 19            |
| 21506625                | 85593332    | 15  | q11.2-q25.2   | 11   | 44            |
| 400368                  | 13601533    | 18  | p23.3_p22     | 12   | 46            |
| 26429175                | 28443413    | 18  | q12           | 16   | 44            |

**Legends:** Recurrent gains and losses regions after exclusion of genomic variant according to the DGV database, observed in more than 40% of cases. Pos SNP Start/ pos SNP End: position of the SNP that represent the boundaries of gains, losses or amplifications. Genomic positions are provided according to human genome 19 references in bp; Chr: chromosome; IMPC: invasive micropapillary carcinoma; IDC-NST: invasive carcinomas of no special type; Luminal B IDC-NST were selected according to Von Minckwitz method [1] \*: losses associated with loss of heterozygosity (LOH).

1. von Minckwitz G, Untch M, Blohmer JU, Costa SD, Eidtmann H, Fasching PA, Gerber B, Eiermann W, Hilfrich J, Huober J *et al*: Definition and impact of pathologic complete response on prognosis after neoadjuvant chemotherapy in various intrinsic breast cancer subtypes. *J Clin Oncol* 2012, 30(15):1796-1804.
