# Supplementary material for: Polarity gene alterations in pure invasive micropapillary carcinomas of the breast
Source: PubMed Central journal article supplement (PMC4095699; doi:10.1186/bcr3653), 2014-05-08
Supplement: bcr3653-S12.pdf [file bcr3653-S12.pdf]

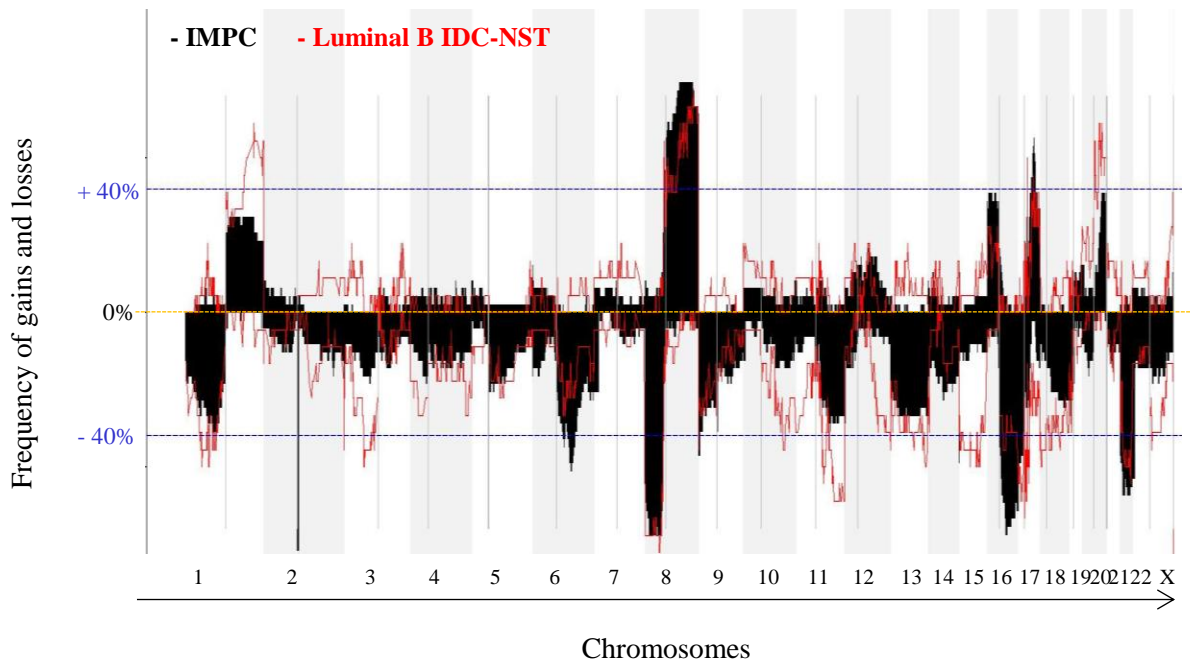

**Supplementary Figure 3**
